# Supplementary material
Source: PubMed Central journal article supplement (PMC6156678)
Supplement: pnas.1807478115.sapp.pdf [file pnas.1807478115.sapp.pdf]

## Supplementary Information for

Fc $\alpha$ RI binding at the IgA1 C<sub>H</sub>2-C<sub>H</sub>3 interface induces long-range conformational changes that are transmitted to the hinge region

Monica T. Posgai, Sam Tondast-Navaei, Manori Jayasinghe, George M. Ibrahim, George Stan, and Andrew B. Herr

Correspondence: George Stan

Email: [george.stan@uc.edu](mailto:george.stan@uc.edu)

Correspondence: Andrew B. Herr

Email: [andrew.herr@cchmc.org](mailto:andrew.herr@cchmc.org)

### **This PDF file includes:**

Supplementary text

Figs. S1 to S7

Tables S1 to S4

Captions for movies SM1 to SM15

References for SI reference citations

### **Other supplementary materials for this manuscript include the following:**

Movies SM1 to SM15

## Supplementary Methods

### Circular Dichroism

Far-UV CD experiments were carried out at 25 °C in an Aviv 215 circular dichroism spectrometer using 0.5 mm quartz cuvettes. Wavelength scans were performed from 260-185 nm with 1 nm steps. Data were collected in triplicate on Fc $\alpha$  wildtype and variant proteins, at concentrations ranging from 0.462 to 1.172 mg/mL, in buffer containing 0.02 M sodium phosphate, pH 7.4. Units were converted from millidegrees to mean residue ellipticity and spectra from 190-240 nm were deconvoluted using reference set 4 of the CDSSTR algorithm in the Dichroweb program (<http://www.cryst.bbk.ac.uk>) (1, 2). Average error values were converted to mean residue ellipticity as described (3).

### IgA1 C<sub>H3</sub> cloning, expression, refolding, and purification

Using the Fc $\alpha$ -pcDNA3 plasmid as a template, PCR was used to amplify residues Ser341-Lys450 encoding the C<sub>H3</sub> domain of IgA1 (C $\alpha$ 3), and insert an upstream tobacco vein mottling virus cleavage site (ETVRFQG). The PCR product was cloned into the Gateway pDEST17 vector containing an N-terminal His-tag (Invitrogen, Carlsbad, CA). Correct sequence was confirmed by DNA sequencing. Tuner (DE3) pLysS cells were induced overnight with 1 mM IPTG for robust expression of C $\alpha$ 3 protein in inclusion bodies, confirmed by Western blot. Cells were lysed by sonication and inclusion body pellets were washed and solubilized overnight in buffer containing 6 M GdnHCl, 0.5 M NaCl, 0.02 M NaH<sub>2</sub>PO<sub>4</sub>, and 0.01 M imidazole. Following HisTrap purification under denaturing conditions, 10 mL of 1 mg/mL reduced denatured C $\alpha$ 3 was dialysis refolded in 500 mL of dialysate containing 0.5 M L-arginine HCl, 0.1 M Tris-HCl, pH 7.4, 0.001 M EDTA, 0.45% (w/v) Cyclofos-4, 0.005 M oxidized glutathione, 0.0005 M reduced glutathione). Over a period of 7 days, dialysate was changed to 0.02 M Tris-HCl, pH 7.4, 0.15 M NaCl by gradual decreases in urea, then arginine, followed by Cyclofos-4. Refolded C $\alpha$ 3 was purified by size chromatography using a Hi Load 26/60 Superdex 75 prep grade column (GE Healthcare). Protein purity was determined to be >95% by SDS-PAGE.

### Analytical ultracentrifugation

To determine whether the purified refolded C $\alpha$ 3 protein formed homodimers in solution, analytical ultracentrifugation sedimentation velocity experiments were carried out at 20 °C using a Proteome Lab XL-I analytical ultracentrifuge (Beckman Coulter, Indianapolis, IN). Refolded C $\alpha$ 3 protein was sedimented at 48,000 rpm overnight. For sedimentation velocity experiments, 400  $\mu$ L samples in 0.02 M Tris-HCl, pH 7.4, and 0.15 M NaCl were centrifuged overnight at 48,000 rpm at 20 °C in a Beckman XL-I using absorbance optics at 280 nm. The data were analyzed by the program Sedfit using the c(s) and c(m) models to determine differential sedimentation coefficient and apparent mass distributions, respectively. C $\alpha$ 3 sedimented primarily as a single peak, with a sedimentation coefficient of 2.28 S and an estimated molecular mass of 25.8 kDa, similar to that expected for a homodimer (28.6 kDa).

## Biosensor Analysis

BIAcore CM5 chip surfaces were prepared for coupling by pre-conditioning to decrease noise and increase sensitivity (4) (2 sequential 50  $\mu$ L pulses at 100  $\mu$ L/min of: 0.05 M NaOH, 0.01 M HCl, 0.1% SDS, and 0.085% H<sub>3</sub>PO<sub>4</sub>), followed by signal normalization between flow cells. Fc $\alpha$  variants were immobilized by standard random-amine chemistry. Ligands (wildtype or mutant Fc $\alpha$ ) in PBS were diluted to 5  $\mu$ g/mL in 10 mM sodium acetate buffer pH 5.0, injected at 5  $\mu$ L/min, and immobilized to ~200 response units (RU). We previously demonstrated that random-amine and oriented capturing produced equivalent binding data (5). The response of a mock-coupled flow cell was subtracted to correct for non-specific interaction of the analyte (soluble Fc $\alpha$ RI ectodomain) with the chip surface, followed by subtraction of a buffer injection. Each chip also contained a control flow cell immobilized with wildtype Fc $\alpha$  to monitor for variations among chips, confirm accurate analyte concentration, and allow for direct comparison of Fc $\alpha$  mutants between chips.

For equilibrium binding experiments, binding curve alignment and buffer blank subtraction were performed with BIAeval 4.1 software (GE Healthcare). The program Scrubber 2.0 (BioLogic Software, Campbell, Australia) was used to generate initial binding isotherms by averaging the response over a 15-second window at equilibrium. Equilibrium data were fitted globally in the program Scientist 3.0 (Micromath, Saint Louis, MO) to a single-site or a bivalent ligand binding model to determine  $K_{D1}$  and  $K_{D2}$ , the binding affinity of the first and second binding events. For the two Fc $\alpha$  mutants with the greatest decreases in affinity (L258A and F443A), binding isotherms did not approach saturation, requiring the plateau values to be fixed at levels corresponding to binding curves from other Fc $\alpha$  variants. The one-site and two-site binding model fits were statistically compared using F-ratio statistics (1),

$$(1) \quad F = \frac{(SS1 - SS2) / SS2}{(DF1 - DF2) / DF2}$$

where SS is the sum of the squared deviations of the fitted experimental data, and DF is the degrees of freedom (data points minus fitted parameters) of the binding model, with '1' and '2' indicating a one-site or two-site binding model, respectively. All calculated F-ratios were greater than 1 (between 6.13 and 275.29), signifying that the bivalent ligand binding model more accurately described the binding data.

For refolded Ca3, SPR assays were also carried out at 25 °C. The A59 antibody (BD-Pharmingen; No. 555685) that recognizes the D2 domain of Fc $\alpha$ RI was diluted to 10  $\mu$ g/mL in 10 mM sodium acetate buffer, pH 4.5, injected at 5  $\mu$ L/min, and immobilized to ~3000 response units (RU) on a CM5 chip using standard random-amine chemistry. Baculovirus-expressed Fc $\alpha$ RI ectodomain, diluted to 20  $\mu$ g/ml in 0.02 M Tris-HCl, pH 7.4, 0.15 M NaCl, was captured until 150-200 RU was achieved. For equilibrium binding experiments, 30  $\mu$ L aliquots of three-fold serial dilutions of Ca3 in degassed TBS-P (0.02 M Tris-HCl pH 7.4, 0.15 M NaCl, 0.005%

Surfactant P20) were injected at 5  $\mu\text{L}/\text{min}$  at concentrations between 950 pM and 694.2 nM. Equilibrium binding curve alignment and subtraction of a buffer blank injection were performed with BIAeval 4.1 software (GE Healthcare).

### **Structure Alignment**

Fc $\alpha$  C<sub>H</sub>2 (C $\alpha$ 2) and C<sub>H</sub>3 (C $\alpha$ 3) domains were defined as residues Cys242–Gly342 and residues Asn343–Lys450, respectively. The backbone of Fc $\alpha$  C $\alpha$ 3 (PDB ID: 1OW0) (6) was aligned with Fc $\alpha$  C $\alpha$ 3 (PDB ID: 2QEJ) (7), and with chicken IgY-Fc C<sub>H</sub>4 (C $\nu$ 4) residues Tyr459-Lys564 (PDB ID: 2W59) (8). Backbone alignments and figures were generated using the program PyMOL (DeLano Scientific, San Francisco, CA).



## Supplementary Figures

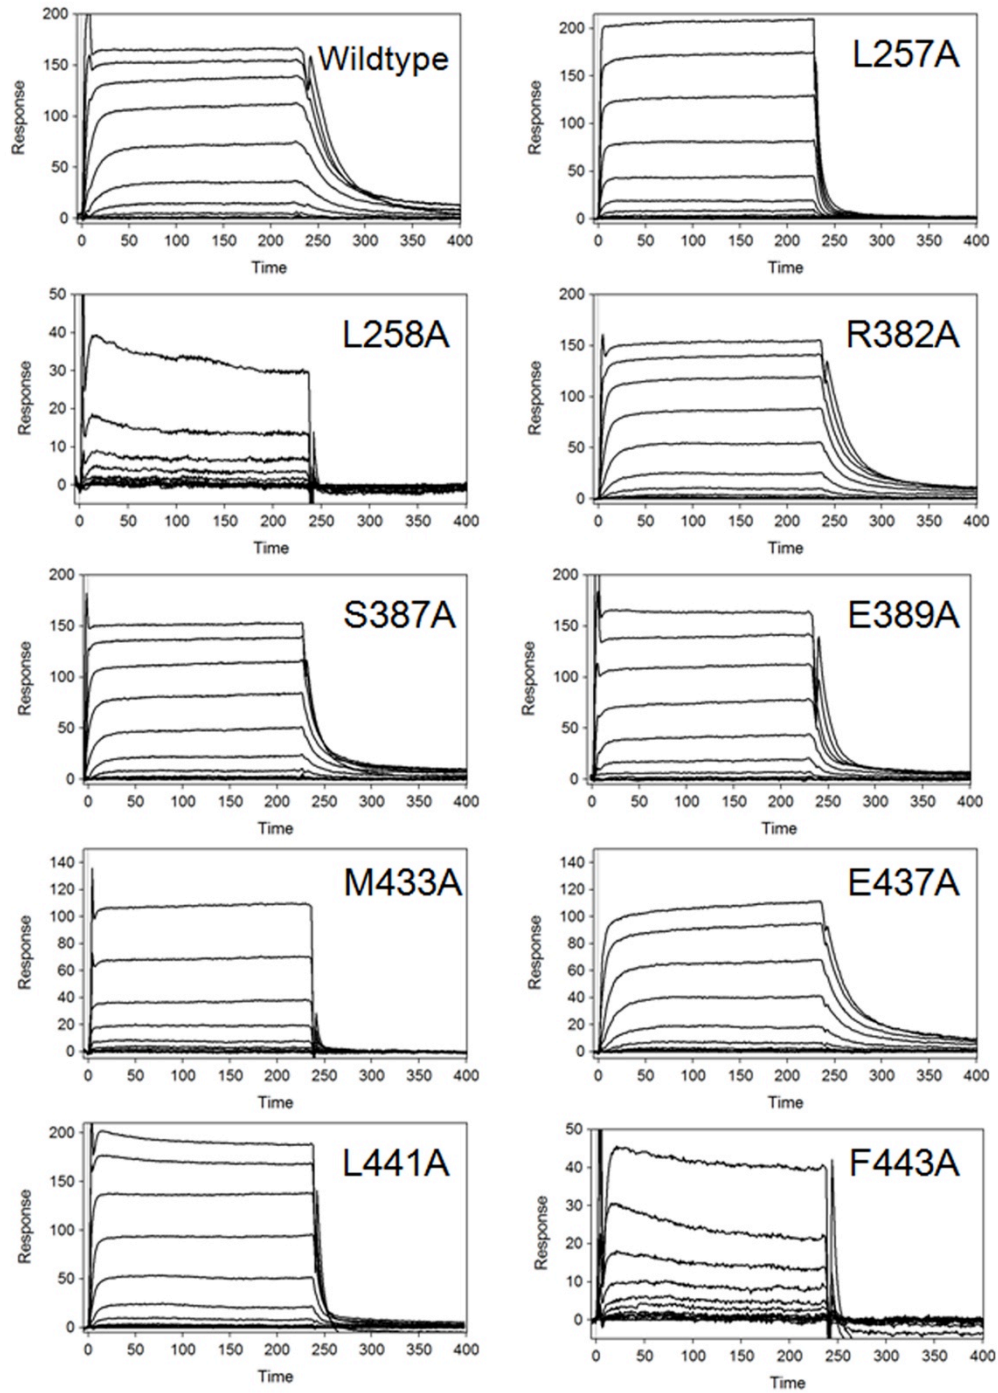

**Figure S1.** Representative equilibrium SPR sensorgrams of soluble FcαRI ectodomain binding to immobilized Fcα variants.

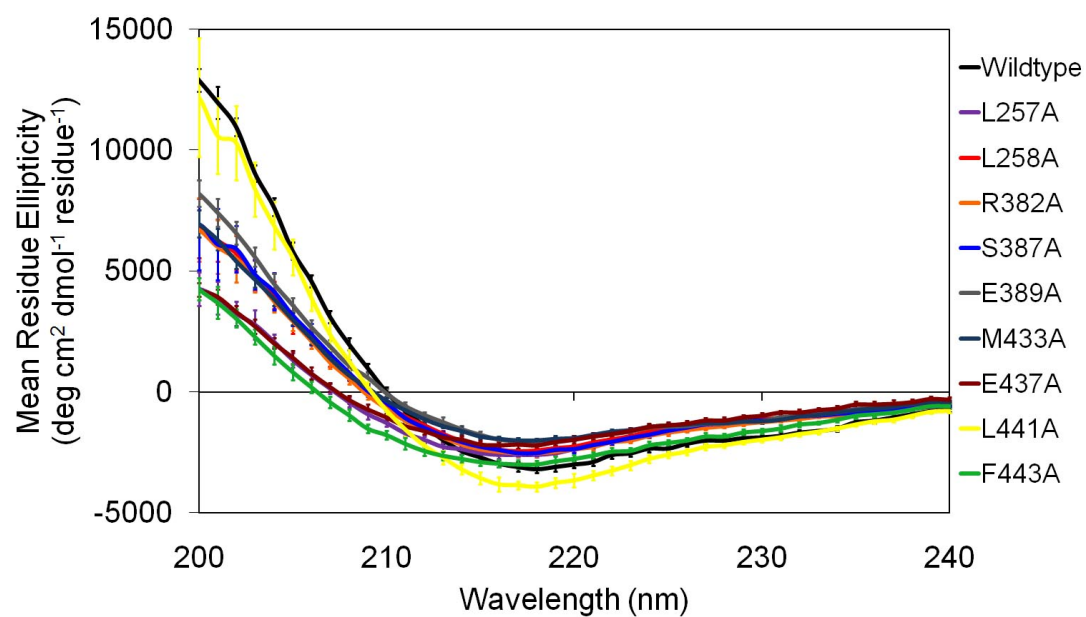

**Figure S2.** Far-UV CD wavelength spectra of Fc $\alpha$  variants.

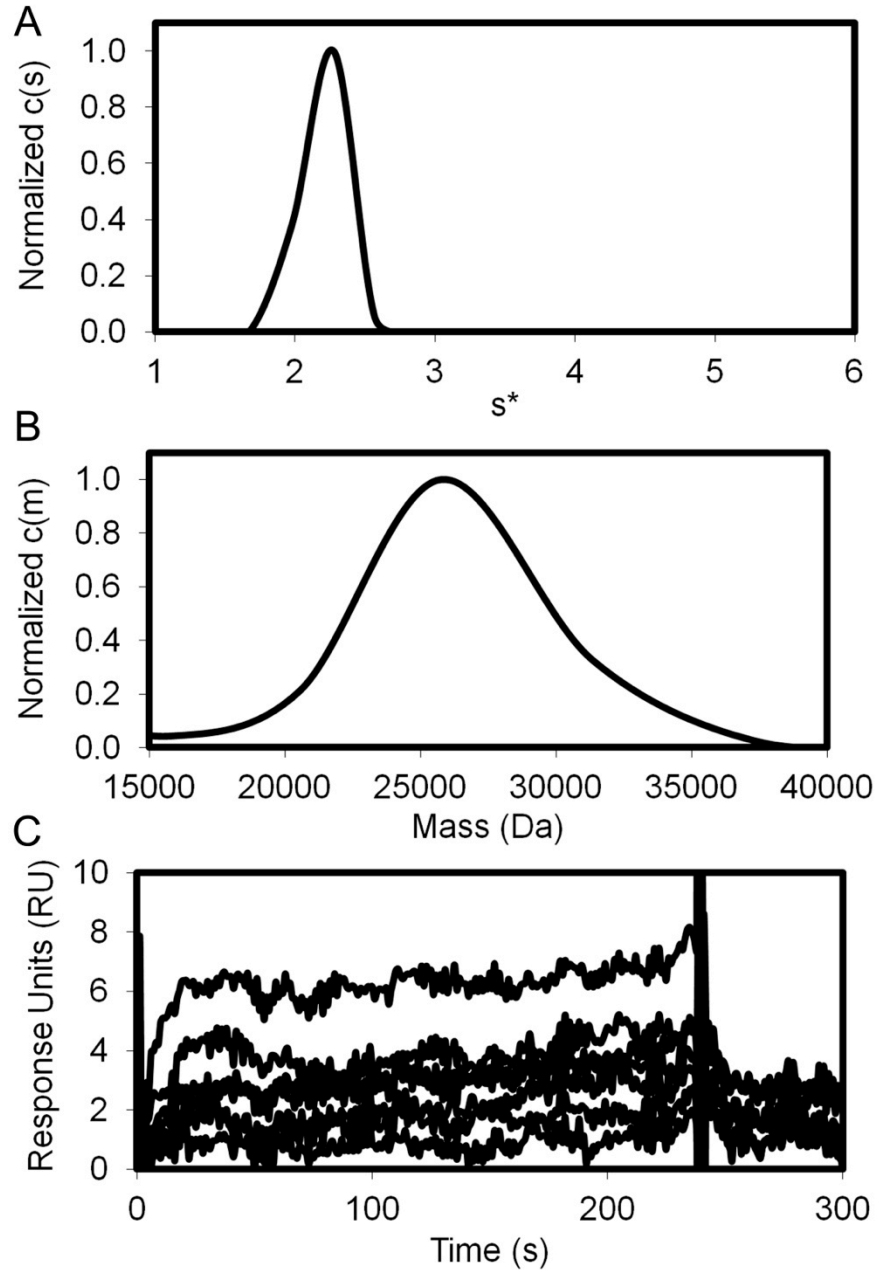

**Figure S3.** A-B) Refolded purified C $\alpha$ 3 forms a non-covalent homodimer in solution, based on sedimentation velocity analytical ultracentrifugation. Panel A shows the sedimentation coefficient distribution, revealing a single species with the predicted mass of a dimer (panel B). C) C $\alpha$ 3 analyte exhibits very low binding levels to captured Fc $\alpha$ RI, indicating that the C $\alpha$ 2 is important in stable complex formation with Fc $\alpha$ RI.

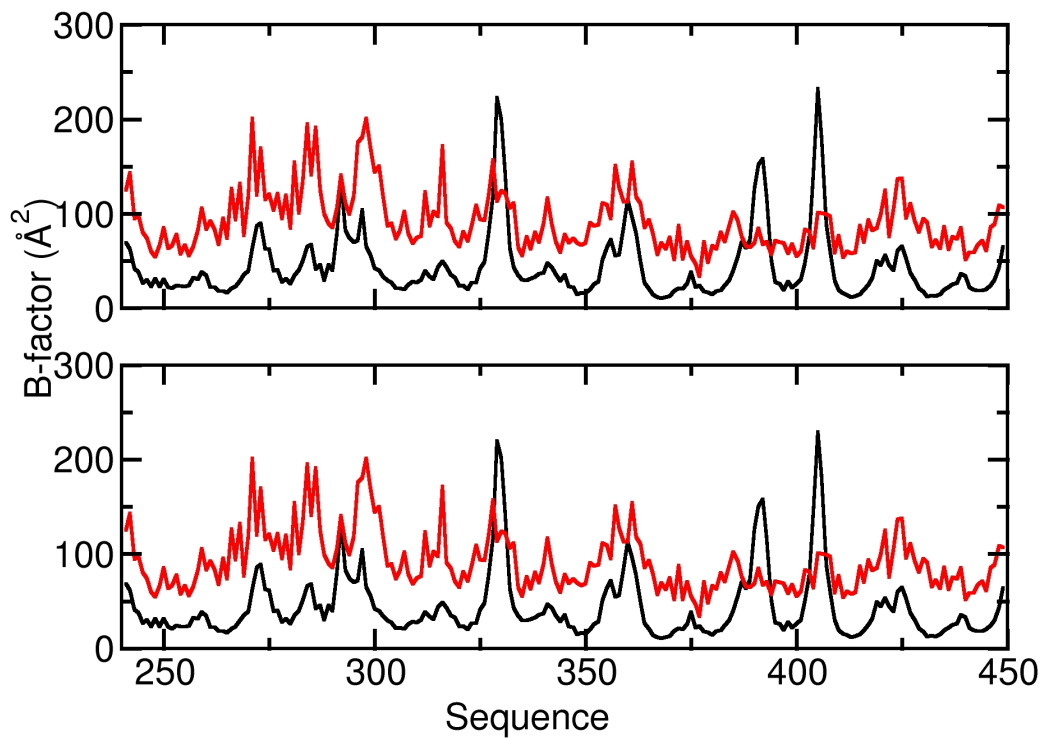

**Figure S4. Experimental and computational B-factors of Fc $\alpha$  heavy chains in the 2:1 Fc $\alpha$ RI:Fc $\alpha$  complex:** Computational (black) and experimental (red) B-factor profiles for each Fc $\alpha$  heavy chain in the 2:1 Fc $\alpha$ RI:Fc $\alpha$  complex are shown in the upper and lower panel, respectively. Experimental B-factors were taken from PDB 1OW0.

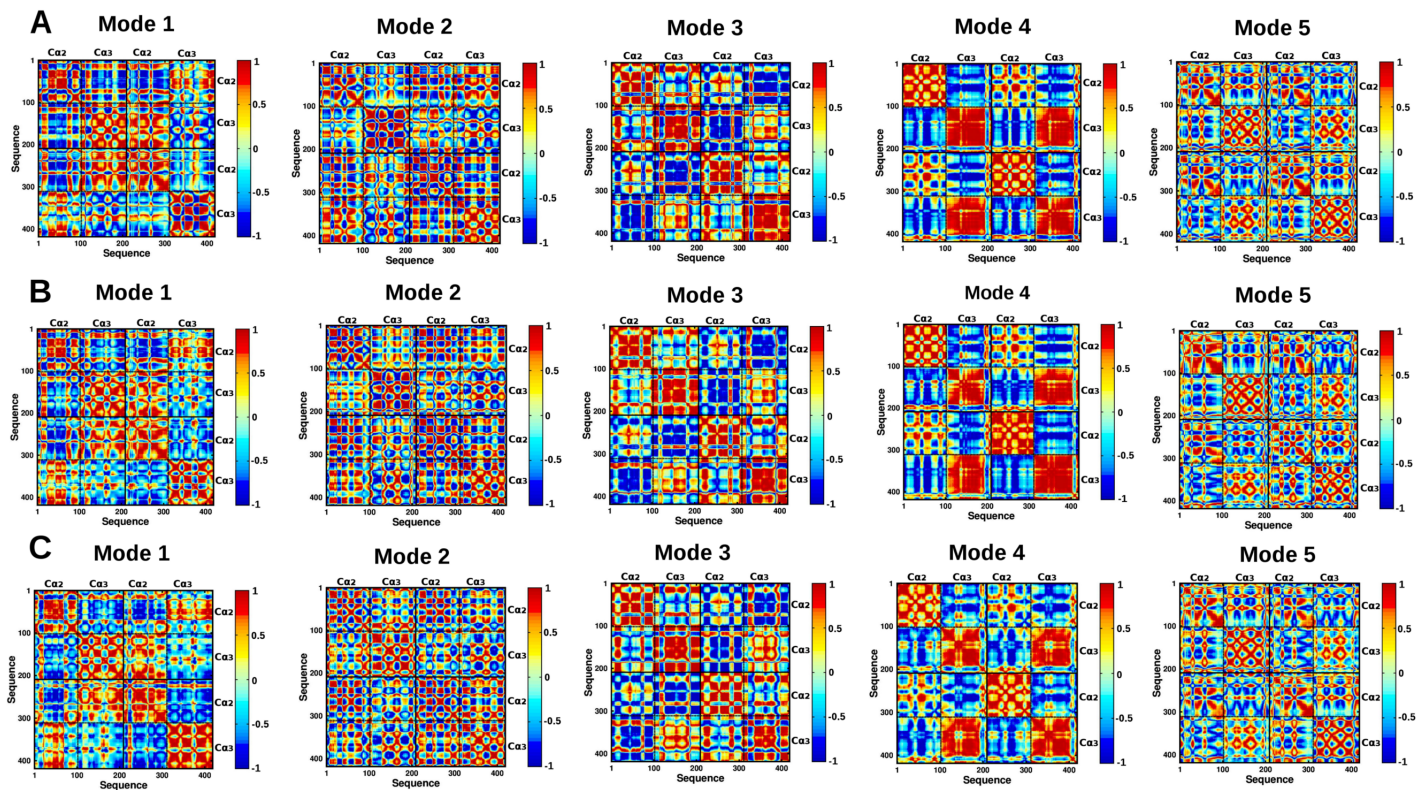

**Figure S5.** Directional correlation maps of Fc $\alpha$  amino acids in the five highest ranked PC modes for the A) Unliganded Fc $\alpha$ ; B) Fc $\alpha$ RI:Fc $\alpha$  1:1 complex; C) Fc $\alpha$ RI:Fc $\alpha$  2:1 complex.



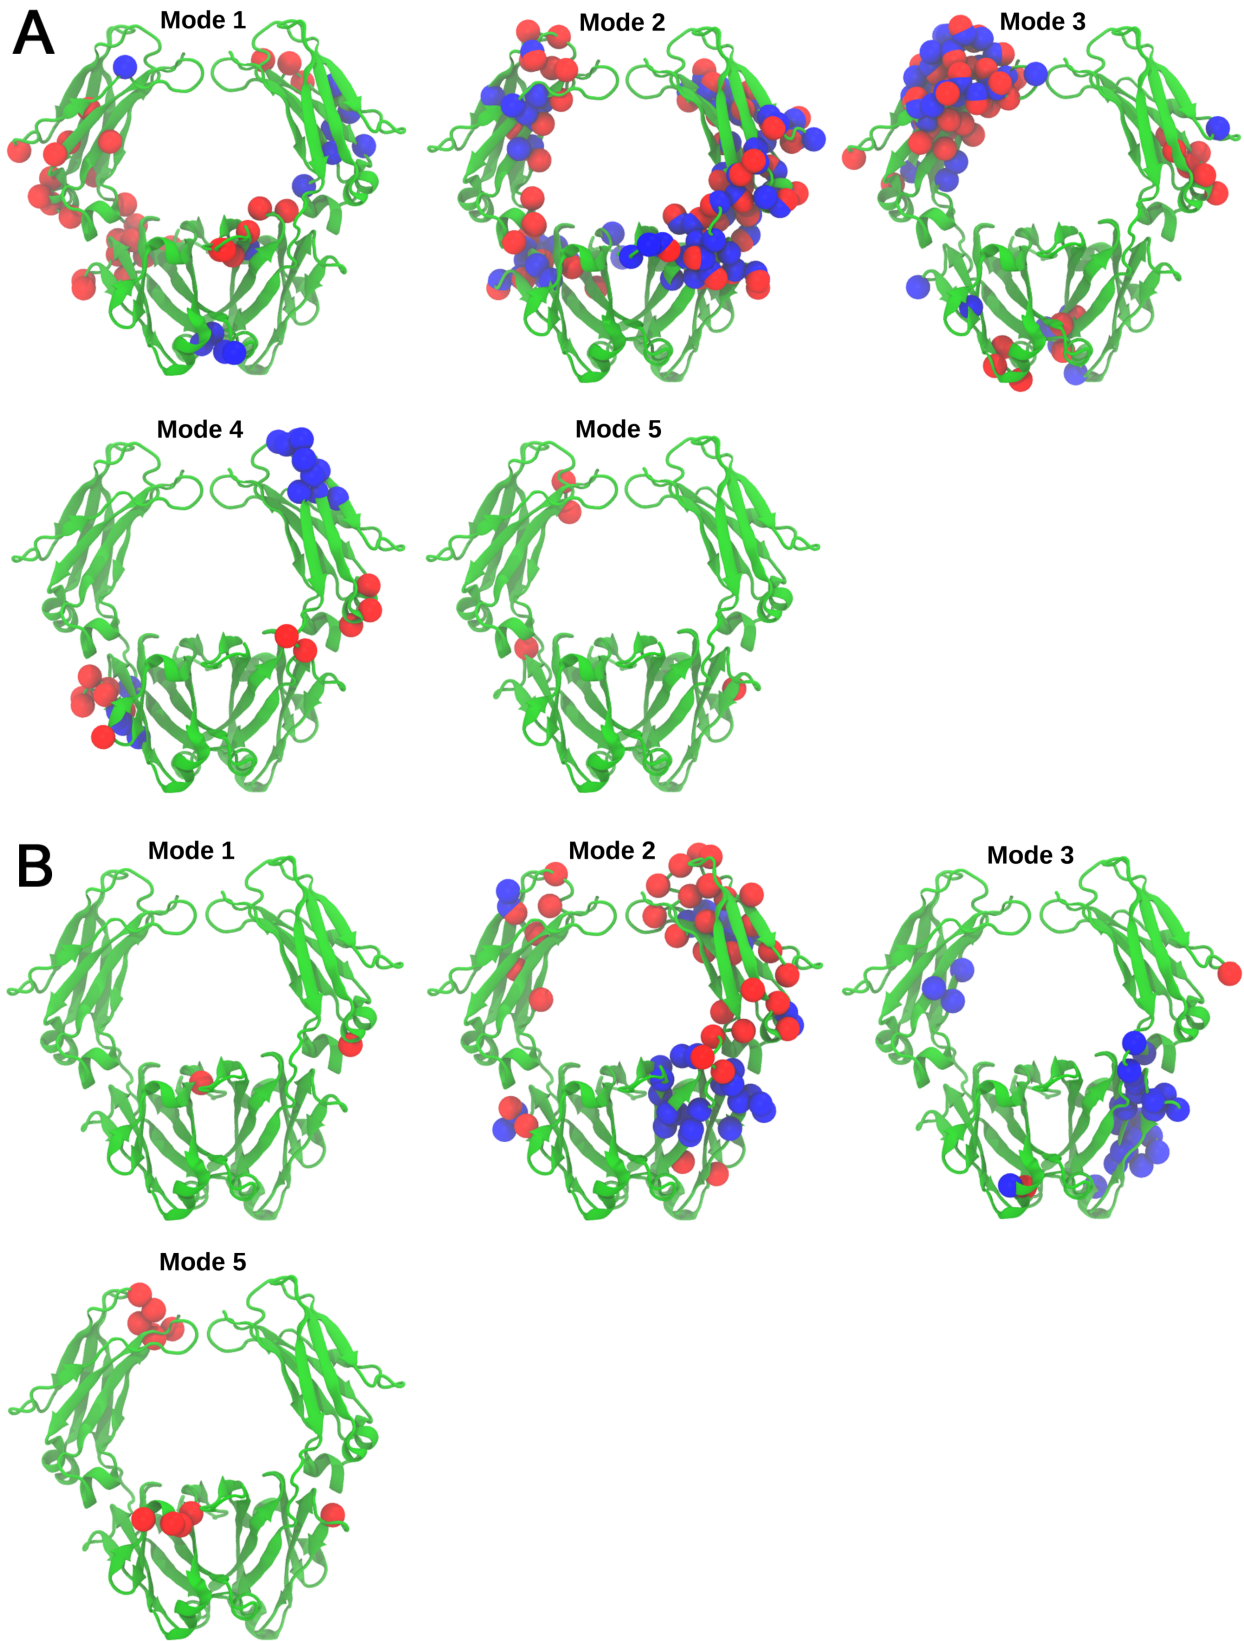

**Figure S6.** Fc $\alpha$  residue pairs that mediate ligand-induced long-distance communication.

A) Structural representation of intersubunit residue pairs which switch from weak directional correlation in the unliganded Fc $\alpha$  to strong correlation (blue spheres) or anticorrelation (red spheres) in the 1:1 and 2:1 Fc $\alpha$ RI:Fc $\alpha$  complexes. The five panels indicate the residue pairs for the five highest ranked PC modes. The detailed list of residue pairs is provided in Supplementary Table S3. B) Structural representation of intersubunit residue pairs which switch from strong correlation, shown using red spheres (or anticorrelation, shown using blue spheres) in unliganded Fc $\alpha$  to strong anticorrelation (correlation) in the 2:1 complex. Mode 4 does not include such residue pairs. The detailed list of residue pairs is provided in Supplementary Table S4.

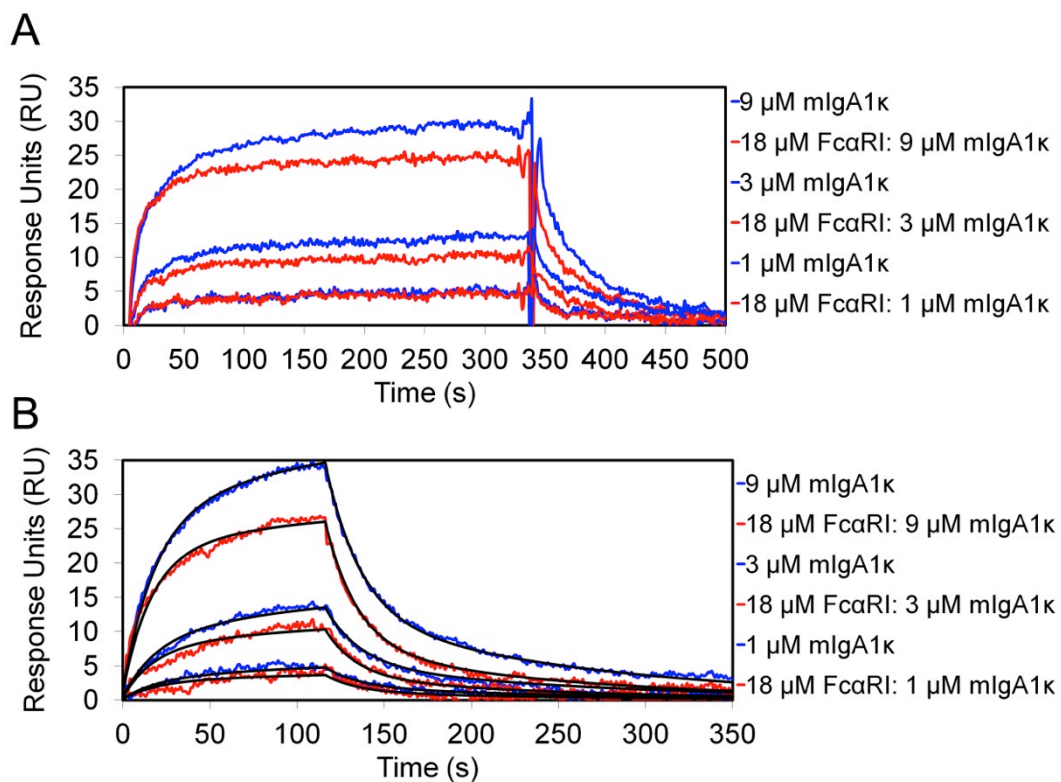

**Figure S7.** Sensorgrams displaying HAA ligand binding to mIgA1 $\kappa$  in the presence or absence of Fc $\alpha$ RI. A) SPR data collected at 5  $\mu\text{l}/\text{minute}$ . B) SPR data collected at 30  $\mu\text{l}/\text{minute}$ , with the bivalent analyte fits superimposed in black.



## Supplementary Tables

**Table S1.** CDSSTR analysis of the secondary structure content of wildtype and mutant Fc $\alpha$  variants revealed that alanine mutations did not alter the secondary structure content.

| Fc $\alpha$ | Helix | Sheet | Turns | Unordered | Total | r.m.s.d. |
|-------------|-------|-------|-------|-----------|-------|----------|
| Wildtype    | 7%    | 41%   | 22%   | 28%       | 98%   | 0.032    |
| L257A       | 6%    | 40%   | 22%   | 31%       | 99%   | 0.070    |
| L258A       | 6%    | 41%   | 23%   | 30%       | 100%  | 0.081    |
| R382A       | 5%    | 42%   | 22%   | 30%       | 99%   | 0.073    |
| S387A       | 5%    | 42%   | 22%   | 31%       | 100%  | 0.092    |
| E389A       | 7%    | 41%   | 21%   | 29%       | 98%   | 0.032    |
| M433A       | 7%    | 39%   | 22%   | 31%       | 99%   | 0.027    |
| E437A       | 6%    | 41%   | 21%   | 30%       | 98%   | 0.041    |
| L441A       | 5%    | 43%   | 22%   | 29%       | 99%   | 0.068    |
| F443A       | 7%    | 39%   | 23%   | 30%       | 99%   | 0.045    |

**Table S2.** Binding interface properties of alanine-scanning Fc $\alpha$  mutants. Experimental  $\Delta\Delta G$  values of energetic hotspot residues did not strongly correlate with the contribution to the binding surface or the percent buried surface area.

| Fc $\alpha$ | Location      | % Binding Surface <sup>a</sup> | BSA ( $\text{\AA}^2$ ) <sup>b</sup> | % Buried <sup>b</sup> | Experimental $\Delta\Delta G$ (kcal/mol) |
|-------------|---------------|--------------------------------|-------------------------------------|-----------------------|------------------------------------------|
| R382        | C strand      | 1%                             | 5.83                                | 20%                   | 0.18                                     |
| E437        | FG loop       | 2%                             | 13.73                               | 50%                   | 0.19                                     |
| S387        | CC' loop      | 10%                            | 68.76                               | 70%                   | 0.27                                     |
| E389        | CC' loop      | 5%                             | 33.43                               | 40%                   | 1.09                                     |
| L441        | FG loop       | 12%                            | 44.30                               | 60%                   | 1.21                                     |
| L257        | AB helix/loop | 8%                             | 55.22                               | 100%                  | 2.34                                     |
| M433        | G strand      | 6%                             | 48.42                               | 100%                  | 2.49                                     |
| F443        | F strand      | 5%                             | 35.89                               | 90%                   | 2.93                                     |
| L258        | AB helix/loop | 10%                            | 77.61                               | 90%                   | 3.44                                     |

<sup>a</sup>from CNS analysis of Fc $\alpha$ RI : Fc $\alpha$  complex (9)

<sup>b</sup>from PISA analysis of Fc $\alpha$ RI : Fc $\alpha$  complex (10)

**Table S3.** Long-distance communication induced by receptor binding. Pairs of amino acids in distinct Fc $\alpha$  subunits, separated by at least 30 Å, which switch from weak directional correlation in the free Fc $\alpha$  to strong correlation in the 1:1 and 2:1 complexes (see Methods).

| Mode | Correlated residue pairs |                            |                            |                                 | Anti-correlated residue pairs |                            |                            |                                 |
|------|--------------------------|----------------------------|----------------------------|---------------------------------|-------------------------------|----------------------------|----------------------------|---------------------------------|
|      | residue                  | correlation in 2:1 complex | correlation in 1:1 complex | correlation in free Fc $\alpha$ | residue                       | correlation in 2:1 complex | correlation in 1:1 complex | correlation in free Fc $\alpha$ |
| 1    | 292-413                  | 0.9420                     | 0.7180                     | 0.0390                          | 265-293                       | -0.9328                    | -0.6003                    | -0.1872                         |
|      | 294-413                  | 0.9305                     | 0.6367                     | -0.0363                         | 265-294                       | -0.9716                    | -0.7050                    | -0.1666                         |
|      | 353-264                  | 0.9326                     | 0.7618                     | 0.1684                          | 265-302                       | -0.9666                    | -0.9085                    | 0.0153                          |
|      | 353-290                  | 0.9009                     | 0.7670                     | 0.1220                          | 265-303                       | -0.9602                    | -0.9242                    | -0.1650                         |
|      | 353-291                  | 0.9245                     | 0.7697                     | 0.1278                          | 285-302                       | -0.9575                    | -0.7561                    | -0.1985                         |
|      | 353-307                  | 0.9389                     | 0.7988                     | 0.1501                          | 306-302                       | -0.9064                    | -0.7954                    | 0.0017                          |
|      | 353-309                  | 0.9447                     | 0.8397                     | 0.1054                          | 308-302                       | -0.9409                    | -0.8992                    | 0.0793                          |
|      | 353-310                  | 0.9377                     | 0.8119                     | 0.0637                          | 309-300                       | -0.9486                    | -0.7615                    | -0.1606                         |
|      | 354-252                  | 0.9825                     | 0.7588                     | 0.1898                          | 313-412                       | -0.9005                    | -0.6851                    | -0.1584                         |
|      | 359-252                  | 0.9611                     | 0.6169                     | 0.0174                          | 314-412                       | -0.9029                    | -0.7749                    | -0.0742                         |
|      | 362-252                  | 0.9173                     | 0.7103                     | 0.1860                          | 316-412                       | -0.9314                    | -0.7729                    | -0.0684                         |
|      |                          |                            |                            |                                 | 317-412                       | -0.9249                    | -0.7713                    | -0.0386                         |
|      |                          |                            |                            |                                 | 339-403                       | -0.9893                    | -0.8415                    | 0.1715                          |
|      |                          |                            |                            |                                 | 341-405                       | -0.9618                    | -0.6062                    | 0.1660                          |
|      |                          |                            |                            |                                 | 342-402                       | -0.9415                    | -0.6227                    | 0.1444                          |
|      |                          |                            |                            |                                 | 342-403                       | -0.9555                    | -0.7864                    | 0.1245                          |
|      |                          |                            |                            |                                 | 342-404                       | -0.9316                    | -0.6117                    | 0.0155                          |
|      |                          |                            |                            |                                 | 342-405                       | -0.9622                    | -0.6328                    | 0.0700                          |
|      |                          |                            |                            |                                 | 343-405                       | -0.9543                    | -0.6071                    | 0.1185                          |
|      |                          |                            |                            |                                 | 344-411                       | -0.9239                    | -0.6383                    | -0.0452                         |
|      |                          |                            |                            |                                 | 345-411                       | -0.9553                    | -0.6427                    | -0.0455                         |
|      |                          |                            |                            |                                 | 346-378                       | -0.9373                    | -0.7895                    | 0.0725                          |

|   |         |        |        |         |         |         |         |         |
|---|---------|--------|--------|---------|---------|---------|---------|---------|
|   |         |        |        |         | 346-411 | -0.9860 | -0.6654 | -0.1280 |
|   |         |        |        |         | 375-377 | -0.9542 | -0.6713 | 0.0023  |
|   |         |        |        |         | 408-402 | -0.9746 | -0.8540 | -0.1975 |
|   |         |        |        |         | 438-378 | -0.9448 | -0.7343 | 0.1973  |
|   |         |        |        |         | 438-411 | -0.9829 | -0.6049 | -0.0533 |
|   |         |        |        |         | 440-412 | -0.9647 | -0.7193 | -0.1635 |
|   |         |        |        |         | 441-412 | -0.9213 | -0.6336 | -0.1135 |
| 2 | 248-405 | 0.9816 | 0.7396 | 0.1806  | 248-367 | -0.9450 | -0.6570 | -0.1335 |
|   | 265-288 | 0.9699 | 0.6890 | 0.0090  | 248-385 | -0.9190 | -0.6695 | -0.0100 |
|   | 265-308 | 0.9492 | 0.7999 | 0.1491  | 248-386 | -0.9455 | -0.6893 | -0.0003 |
|   | 267-292 | 0.9986 | 0.9473 | -0.1972 | 248-418 | -0.9369 | -0.6523 | -0.0839 |
|   | 267-305 | 0.9292 | 0.9251 | -0.1709 | 248-419 | -0.9670 | -0.6941 | -0.1070 |
|   | 267-306 | 0.9159 | 0.9469 | -0.1487 | 248-428 | -0.9887 | -0.7310 | -0.1519 |
|   | 268-293 | 0.9480 | 0.9053 | -0.0541 | 248-429 | -0.9852 | -0.7161 | -0.0568 |
|   | 275-292 | 0.9094 | 0.8374 | 0.0645  | 248-430 | -0.9688 | -0.6707 | 0.0127  |
|   | 275-294 | 0.9808 | 0.7621 | 0.0030  | 248-449 | -0.9005 | -0.6495 | -0.1919 |
|   | 275-295 | 0.9841 | 0.7216 | -0.0859 | 249-246 | -0.9992 | -0.7601 | -0.1437 |
|   | 275-305 | 0.9910 | 0.8427 | 0.1357  | 249-247 | -0.9598 | -0.6438 | 0.1149  |
|   | 279-287 | 0.9577 | 0.6784 | 0.1920  | 249-324 | -0.9291 | -0.6339 | -0.0617 |
|   | 292-265 | 0.9177 | 0.6387 | 0.0476  | 249-330 | -0.9790 | -0.8181 | -0.1761 |
|   | 304-291 | 0.9550 | 0.6719 | -0.0288 | 249-331 | -0.9882 | -0.7598 | -0.0969 |
|   | 304-292 | 0.9537 | 0.7224 | 0.0472  | 249-332 | -0.9894 | -0.7092 | -0.0392 |
|   | 304-294 | 0.9413 | 0.6044 | -0.0832 | 249-333 | -0.9854 | -0.6950 | -0.0183 |
|   | 304-304 | 0.9209 | 0.6022 | 0.0062  | 249-334 | -0.9712 | -0.6502 | 0.0493  |
|   | 304-305 | 0.9908 | 0.6973 | 0.0207  | 249-353 | -0.9584 | -0.8143 | 0.0279  |
|   | 304-306 | 0.9733 | 0.7401 | 0.0364  | 249-354 | -0.9502 | -0.8546 | -0.1234 |
|   | 305-290 | 0.9146 | 0.6910 | 0.0057  | 249-358 | -0.9547 | -0.8661 | -0.1730 |
|   | 344-341 | 0.9934 | 0.6037 | 0.1845  | 249-359 | -0.9645 | -0.8674 | -0.0932 |
|   | 346-321 | 0.9582 | 0.6075 | 0.1983  | 249-360 | -0.9530 | -0.8657 | -0.1597 |
|   | 374-340 | 0.9986 | 0.6588 | 0.1982  | 249-361 | -0.9778 | -0.8626 | -0.0601 |
|   | 375-434 | 0.9499 | 0.6847 | 0.1917  | 249-362 | -0.9798 | -0.8580 | 0.1200  |

|         |        |        |         |         |         |         |         |
|---------|--------|--------|---------|---------|---------|---------|---------|
| 401-282 | 0.9685 | 0.6573 | 0.1719  | 249-450 | -0.9680 | -0.8398 | 0.1696  |
| 406-281 | 0.9013 | 0.6059 | 0.1561  | 252-353 | -0.9395 | -0.8532 | -0.1822 |
| 434-407 | 0.9753 | 0.7667 | -0.0665 | 253-450 | -0.9314 | -0.8480 | -0.1037 |
| 434-408 | 0.9629 | 0.7011 | -0.1889 | 254-353 | -0.9386 | -0.9150 | -0.0938 |
| 435-407 | 0.9614 | 0.9972 | -0.0756 | 254-354 | -0.9261 | -0.8967 | -0.0996 |
| 435-408 | 0.9769 | 0.9949 | -0.1932 | 258-353 | -0.9329 | -0.9650 | -0.1541 |
| 437-251 | 0.9255 | 0.7758 | 0.1551  | 258-354 | -0.9345 | -0.9650 | -0.1914 |
| 437-253 | 0.9517 | 0.7830 | 0.1361  | 266-335 | -0.9331 | -0.8159 | -0.1786 |
| 437-256 | 0.9251 | 0.7190 | 0.1188  | 266-336 | -0.9107 | -0.6616 | 0.0200  |
| 437-257 | 0.9111 | 0.7116 | 0.0934  | 267-250 | -0.9133 | -0.7725 | -0.0973 |
| 437-285 | 0.9145 | 0.8378 | 0.1395  | 267-318 | -0.9441 | -0.9400 | -0.0696 |
| 437-311 | 0.9001 | 0.7237 | 0.0944  | 267-319 | -0.9285 | -0.9305 | -0.0522 |
| 437-312 | 0.9381 | 0.7698 | 0.1165  | 267-320 | -0.9810 | -0.9807 | 0.0554  |
| 437-313 | 0.9647 | 0.8398 | 0.1717  | 267-321 | -0.9491 | -0.9600 | 0.1337  |
| 437-344 | 0.9377 | 0.8358 | 0.1832  | 267-338 | -0.9479 | -0.9436 | 0.1340  |
| 437-345 | 0.9581 | 0.7889 | 0.1204  | 267-339 | -0.9944 | -0.9953 | -0.0339 |
| 437-346 | 0.9530 | 0.7561 | 0.0524  | 267-340 | -0.9847 | -0.9707 | -0.1284 |
| 437-347 | 0.9566 | 0.7951 | 0.0604  | 267-341 | -0.9807 | -0.9525 | -0.1828 |
| 437-371 | 0.9646 | 0.8379 | 0.0186  | 268-283 | -0.9460 | -0.9565 | 0.0198  |
| 437-374 | 0.9466 | 0.7607 | 0.0081  | 268-318 | -0.9557 | -0.9100 | -0.1711 |
| 437-375 | 0.9573 | 0.7522 | 0.0039  | 268-319 | -0.9630 | -0.9230 | -0.1556 |
| 437-376 | 0.9785 | 0.8243 | 0.0760  | 268-320 | -0.9503 | -0.8311 | 0.1788  |
| 437-377 | 0.9880 | 0.8492 | 0.0768  | 268-340 | -0.9424 | -0.8619 | -0.0940 |
| 437-411 | 0.9158 | 0.6942 | -0.1597 | 268-341 | -0.9201 | -0.8523 | -0.1707 |
| 437-438 | 0.9932 | 0.7800 | 0.0840  | 271-321 | -0.9193 | -0.8091 | -0.1463 |
| 437-439 | 0.9945 | 0.7879 | 0.0994  | 273-321 | -0.9027 | -0.8104 | -0.1554 |
| 437-440 | 0.9993 | 0.7822 | 0.1083  | 275-283 | -0.9281 | -0.8351 | -0.1112 |
| 437-441 | 0.9967 | 0.8086 | 0.1674  | 275-320 | -0.9414 | -0.8824 | -0.0743 |
| 438-250 | 0.9812 | 0.6258 | 0.0548  | 275-321 | -0.9174 | -0.8390 | 0.0248  |
| 438-317 | 0.9790 | 0.6344 | 0.0373  | 302-282 | -0.9045 | -0.6074 | 0.0304  |

|         |        |        |        |
|---------|--------|--------|--------|
| 438-318 | 0.9982 | 0.7440 | 0.1865 |
| 438-340 | 0.9823 | 0.7431 | 0.1797 |
| 438-341 | 0.9825 | 0.6758 | 0.1032 |
| 439-320 | 0.9847 | 0.7164 | 0.0830 |
| 439-321 | 0.9593 | 0.7429 | 0.1851 |
| 439-339 | 0.9603 | 0.7164 | 0.0611 |
| 440-320 | 0.9923 | 0.7698 | 0.0619 |
| 440-321 | 0.9897 | 0.8001 | 0.1640 |
| 440-339 | 0.9536 | 0.7578 | 0.0425 |

|         |         |         |         |
|---------|---------|---------|---------|
| 303-282 | -0.9055 | -0.6654 | 0.0057  |
| 327-251 | -0.9675 | -0.6962 | -0.1171 |
| 327-253 | -0.9551 | -0.6946 | -0.1865 |
| 327-378 | -0.9326 | -0.6662 | 0.0067  |
| 327-379 | -0.9589 | -0.6563 | 0.0321  |
| 327-380 | -0.9962 | -0.7806 | -0.1251 |
| 327-381 | -0.9953 | -0.8130 | -0.1654 |
| 327-397 | -0.9892 | -0.8036 | -0.1427 |
| 327-398 | -0.9250 | -0.6862 | -0.0167 |
| 327-415 | -0.9570 | -0.8181 | -0.1605 |
| 327-434 | -0.9904 | -0.7000 | -0.0766 |
| 327-435 | -0.9751 | -0.6896 | -0.0965 |
| 327-443 | -0.9701 | -0.6625 | -0.1121 |
| 327-445 | -0.9542 | -0.7657 | -0.1424 |
| 328-315 | -0.9004 | -0.6432 | 0.1386  |
| 328-378 | -0.9292 | -0.7136 | -0.0967 |
| 328-379 | -0.9465 | -0.6966 | -0.0748 |
| 328-398 | -0.9040 | -0.7152 | -0.1296 |
| 328-434 | -0.9786 | -0.7359 | -0.1841 |
| 328-436 | -0.9268 | -0.6464 | -0.0721 |
| 328-442 | -0.9262 | -0.6269 | -0.1308 |
| 347-293 | -0.9284 | -0.6896 | -0.1822 |
| 372-290 | -0.9132 | -0.6228 | -0.1724 |
| 372-291 | -0.9234 | -0.6262 | -0.1545 |
| 372-292 | -0.9217 | -0.6241 | -0.1589 |
| 381-279 | -0.9019 | -0.6209 | -0.1977 |
| 434-425 | -0.9383 | -0.8312 | -0.1602 |
| 435-243 | -0.9571 | -0.9592 | 0.1681  |
| 435-245 | -0.9095 | -0.9239 | 0.1977  |
| 435-425 | -0.9498 | -0.9770 | -0.1524 |

|   |         |        |        |        |         |         |         |         |
|---|---------|--------|--------|--------|---------|---------|---------|---------|
|   |         |        |        |        | 435-450 | -0.9643 | -0.9743 | -0.0515 |
|   |         |        |        |        | 436-296 | -0.9164 | -0.9718 | -0.1129 |
|   |         |        |        |        | 436-297 | -0.9362 | -0.9674 | -0.1604 |
|   |         |        |        |        | 436-298 | -0.9457 | -0.9799 | -0.1027 |
|   |         |        |        |        | 436-299 | -0.9414 | -0.9977 | 0.1923  |
|   |         |        |        |        | 436-302 | -0.9707 | -0.9993 | 0.1389  |
|   |         |        |        |        | 436-303 | -0.9792 | -0.9979 | 0.0810  |
|   |         |        |        |        | 436-304 | -0.9641 | -0.9955 | 0.0587  |
|   |         |        |        |        | 437-270 | -0.9139 | -0.8363 | -0.1006 |
|   |         |        |        |        | 437-271 | -0.9441 | -0.8526 | -0.1359 |
|   |         |        |        |        | 437-272 | -0.9587 | -0.8586 | -0.1398 |
|   |         |        |        |        | 437-273 | -0.9714 | -0.8656 | -0.1599 |
|   |         |        |        |        | 437-278 | -0.9308 | -0.8371 | -0.1365 |
|   |         |        |        |        | 438-299 | -0.9151 | -0.6393 | -0.0232 |
|   |         |        |        |        | 438-302 | -0.9171 | -0.6634 | -0.0912 |
|   |         |        |        |        | 438-303 | -0.9195 | -0.7000 | -0.1496 |
|   |         |        |        |        | 438-304 | -0.9458 | -0.7240 | -0.1743 |
|   |         |        |        |        | 439-291 | -0.9612 | -0.6496 | 0.1013  |
|   |         |        |        |        | 439-292 | -0.9712 | -0.6803 | 0.0688  |
|   |         |        |        |        | 439-293 | -0.9681 | -0.7576 | -0.1636 |
|   |         |        |        |        | 439-294 | -0.9923 | -0.6114 | 0.0727  |
|   |         |        |        |        | 439-295 | -0.9869 | -0.6285 | 0.0060  |
|   |         |        |        |        | 440-291 | -0.9227 | -0.7252 | 0.1303  |
|   |         |        |        |        | 440-292 | -0.9413 | -0.7482 | 0.0965  |
|   |         |        |        |        | 440-293 | -0.9818 | -0.8293 | -0.1339 |
|   |         |        |        |        | 440-294 | -0.9975 | -0.6953 | 0.1023  |
|   |         |        |        |        | 440-295 | -0.9954 | -0.7134 | 0.0364  |
|   |         |        |        |        | 440-297 | -0.9515 | -0.6020 | 0.1753  |
|   |         |        |        |        | 443-422 | -0.9007 | -0.6091 | 0.0553  |
| 3 | 249-365 | 0.9472 | 0.7900 | 0.1679 | 243-311 | -0.9845 | -0.8131 | -0.1361 |

|         |        |        |         |         |         |         |         |
|---------|--------|--------|---------|---------|---------|---------|---------|
| 250-420 | 0.9509 | 0.6131 | 0.1313  | 244-311 | -0.9716 | -0.8663 | -0.1666 |
| 250-421 | 0.9112 | 0.9273 | -0.0265 | 245-311 | -0.9799 | -0.8060 | -0.1565 |
| 271-425 | 0.9667 | 0.6561 | -0.1618 | 246-311 | -0.9669 | -0.8349 | -0.1552 |
| 272-425 | 0.9741 | 0.6719 | -0.1251 | 247-311 | -0.9660 | -0.7559 | -0.1864 |
| 273-425 | 0.9660 | 0.7166 | -0.0227 | 265-311 | -0.9276 | -0.7740 | -0.1565 |
| 274-425 | 0.9860 | 0.8026 | 0.0296  | 266-311 | -0.9591 | -0.8010 | -0.0697 |
| 275-425 | 0.9844 | 0.8109 | 0.0294  | 267-311 | -0.9675 | -0.8304 | -0.1136 |
| 276-425 | 0.9460 | 0.8474 | 0.1565  | 268-311 | -0.9698 | -0.8518 | -0.0872 |
| 277-425 | 0.9544 | 0.8292 | 0.0856  | 269-311 | -0.9737 | -0.8505 | -0.1262 |
| 278-425 | 0.9025 | 0.8633 | 0.1917  | 270-311 | -0.9788 | -0.8714 | -0.1372 |
| 279-425 | 0.9122 | 0.8521 | 0.1227  | 271-311 | -0.9696 | -0.9165 | -0.1319 |
| 291-425 | 0.9541 | 0.8681 | 0.0731  | 272-311 | -0.9717 | -0.9252 | -0.1338 |
| 292-425 | 0.9718 | 0.8727 | 0.0245  | 273-311 | -0.9544 | -0.9459 | -0.1175 |
| 293-425 | 0.9287 | 0.7094 | -0.1708 | 273-314 | -0.9033 | -0.6534 | -0.1587 |
| 294-425 | 0.9655 | 0.7413 | -0.1364 | 274-311 | -0.9595 | -0.8755 | 0.0565  |
| 295-425 | 0.9397 | 0.7373 | -0.1161 | 274-314 | -0.9492 | -0.7155 | -0.1451 |
| 296-425 | 0.9518 | 0.7486 | -0.0937 | 275-311 | -0.9605 | -0.8632 | 0.0734  |
| 299-425 | 0.9163 | 0.9000 | 0.1296  | 275-314 | -0.9428 | -0.7196 | -0.1382 |
| 301-425 | 0.9684 | 0.7080 | -0.1447 | 276-311 | -0.9087 | -0.8695 | 0.0777  |
| 302-425 | 0.9658 | 0.6625 | -0.1897 | 277-311 | -0.9226 | -0.8530 | 0.0978  |
| 304-425 | 0.9567 | 0.7107 | -0.1437 | 277-314 | -0.9349 | -0.7406 | -0.1849 |
| 306-425 | 0.9449 | 0.7712 | -0.0973 | 279-314 | -0.9202 | -0.7506 | -0.1949 |
| 320-284 | 0.9384 | 0.8234 | 0.1653  | 285-367 | -0.9959 | -0.8891 | -0.0403 |
| 323-425 | 0.9221 | 0.6731 | -0.1708 | 291-311 | -0.9472 | -0.7769 | 0.1546  |
| 324-425 | 0.9071 | 0.7080 | -0.0640 | 292-311 | -0.9769 | -0.7810 | 0.1412  |
| 325-425 | 0.9363 | 0.7269 | -0.0475 | 293-311 | -0.9668 | -0.8499 | -0.0152 |
| 326-425 | 0.9127 | 0.7475 | 0.0315  | 294-311 | -0.9864 | -0.8214 | 0.0322  |
| 327-425 | 0.9432 | 0.7510 | 0.0218  | 295-311 | -0.9617 | -0.8616 | -0.0598 |
| 328-425 | 0.9285 | 0.7450 | 0.0605  | 296-311 | -0.9651 | -0.8724 | -0.0882 |
| 329-425 | 0.9392 | 0.6971 | -0.0241 | 297-311 | -0.9028 | -0.8989 | -0.1842 |



|   |         |        |        |         |         |         |         |         |
|---|---------|--------|--------|---------|---------|---------|---------|---------|
|   | 330-425 | 0.9308 | 0.6660 | -0.0791 | 300-311 | -0.9959 | -0.8936 | -0.1350 |
|   | 331-425 | 0.9016 | 0.6712 | -0.0204 | 301-311 | -0.9740 | -0.9054 | -0.1612 |
|   | 332-425 | 0.9163 | 0.6004 | -0.1216 | 302-311 | -0.9856 | -0.9084 | -0.1261 |
|   | 333-425 | 0.9058 | 0.6527 | -0.0844 | 303-311 | -0.9762 | -0.8767 | -0.0966 |
|   | 384-419 | 0.9210 | 0.6509 | 0.1906  | 304-311 | -0.9704 | -0.8721 | -0.0423 |
|   | 441-419 | 0.9871 | 0.7197 | -0.0096 | 305-311 | -0.9710 | -0.8387 | -0.0336 |
|   | 441-420 | 0.9190 | 0.8571 | 0.1405  | 306-311 | -0.9534 | -0.8087 | 0.0619  |
|   |         |        |        |         | 307-311 | -0.9463 | -0.7647 | 0.0352  |
|   |         |        |        |         | 318-353 | -0.9412 | -0.9094 | -0.0452 |
|   |         |        |        |         | 319-352 | -0.9431 | -0.7806 | 0.1902  |
|   |         |        |        |         | 323-311 | -0.9001 | -0.8101 | 0.0583  |
|   |         |        |        |         | 325-311 | -0.9048 | -0.8646 | 0.0332  |
|   |         |        |        |         | 325-313 | -0.9104 | -0.6046 | -0.1301 |
|   |         |        |        |         | 325-314 | -0.9196 | -0.6084 | -0.0762 |
|   |         |        |        |         | 326-314 | -0.9225 | -0.6494 | -0.1586 |
|   |         |        |        |         | 327-311 | -0.9064 | -0.9037 | -0.0012 |
|   |         |        |        |         | 327-314 | -0.9355 | -0.6624 | -0.1596 |
|   |         |        |        |         | 329-311 | -0.9031 | -0.9287 | -0.0731 |
|   |         |        |        |         | 329-314 | -0.9308 | -0.6105 | -0.1408 |
|   |         |        |        |         | 334-311 | -0.9246 | -0.8718 | -0.0844 |
|   |         |        |        |         | 335-311 | -0.9075 | -0.8460 | -0.0689 |
|   |         |        |        |         | 336-311 | -0.9488 | -0.7931 | -0.1560 |
|   |         |        |        |         | 337-311 | -0.9190 | -0.7303 | -0.1674 |
|   |         |        |        |         | 353-321 | -0.9082 | -0.8229 | -0.0279 |
|   |         |        |        |         | 427-311 | -0.9384 | -0.8010 | -0.1878 |
|   |         |        |        |         | 448-309 | -0.9242 | -0.7733 | -0.1953 |
|   |         |        |        |         | 449-307 | -0.9439 | -0.7157 | -0.1882 |
|   |         |        |        |         | 449-309 | -0.9698 | -0.6956 | 0.0312  |
|   |         |        |        |         | 450-311 | -0.9949 | -0.7791 | -0.0651 |
| 4 | 346-331 | 0.9721 | 0.9496 | 0.1647  | 387-314 | -0.9172 | -0.6968 | -0.1889 |

|   |         |        |        |         |         |         |         |         |
|---|---------|--------|--------|---------|---------|---------|---------|---------|
|   | 444-327 | 0.9569 | 0.9754 | 0.1559  | 387-316 | -0.9463 | -0.7049 | -0.1993 |
|   | 444-328 | 0.9156 | 0.9532 | 0.0591  | 387-317 | -0.9255 | -0.6657 | -0.0931 |
|   | 444-329 | 0.9343 | 0.9673 | 0.0639  | 439-343 | -0.9070 | -0.8652 | 0.1242  |
|   | 444-330 | 0.9629 | 0.9906 | 0.1924  | 440-343 | -0.9610 | -0.9005 | 0.0389  |
|   | 445-279 | 0.9080 | 0.9426 | -0.0046 | 440-344 | -0.9590 | -0.9521 | -0.1533 |
|   | 445-325 | 0.9098 | 0.9089 | -0.0078 | 441-343 | -0.9680 | -0.8954 | 0.1369  |
|   | 445-326 | 0.9718 | 0.9546 | -0.1456 | 441-344 | -0.9560 | -0.9558 | -0.1033 |
|   | 445-331 | 0.9779 | 0.9675 | -0.1233 | 443-343 | -0.9493 | -0.8710 | -0.1293 |
|   | 445-332 | 0.9697 | 0.9162 | 0.0660  | 444-344 | -0.9568 | -0.9631 | -0.0817 |
|   | 446-332 | 0.9430 | 0.8245 | -0.1588 |         |         |         |         |
|   | 446-333 | 0.9641 | 0.8628 | 0.0529  |         |         |         |         |
|   | 446-334 | 0.9054 | 0.8164 | 0.1068  |         |         |         |         |
| 5 |         |        |        |         | 244-443 | -0.9850 | -0.7724 | -0.0025 |
|   |         |        |        |         | 245-443 | -0.9968 | -0.7747 | -0.1528 |
|   |         |        |        |         | 437-443 | -0.9315 | -0.8805 | -0.1535 |

**Table S4.** Effect of receptor binding on long-distance communication in Fc $\alpha$ . Pairs of amino acids in distinct Fc $\alpha$  subunits, separated by at least 30 Å, that undergo changes from strong directional correlation (anticorrelation) to strong anticorrelation (correlation) upon Fc $\alpha$ RI binding.

| Mode | Strong-negative to strong-positive |                                  |                                  |                           | Strong-positive to strong-negative |                                  |                                  |                           |
|------|------------------------------------|----------------------------------|----------------------------------|---------------------------|------------------------------------|----------------------------------|----------------------------------|---------------------------|
|      | residue                            | correlation<br>in 2:1<br>complex | correlation<br>in 1:1<br>complex | correlation<br>in free Fc | residue                            | correlation<br>in 2:1<br>complex | correlation<br>in 1:1<br>complex | correlation<br>in free Fc |
| 1    |                                    |                                  |                                  |                           | 398-316                            | -0.9210                          | 0.5609                           | 0.9794                    |
| 2    | 276-291                            | 0.9264                           | 0.6142                           | -0.9984                   | 249-447                            | -0.9329                          | -0.5001                          | 0.9213                    |
|      | 276-292                            | 0.9372                           | 0.6736                           | -0.9989                   | 266-351                            | -0.9334                          | -0.4825                          | 0.9635                    |
|      | 276-293                            | 0.9331                           | 0.4956                           | -0.9606                   | 268-281                            | -0.9623                          | -0.0786                          | 0.9957                    |
|      | 276-294                            | 0.9877                           | 0.5373                           | -0.9948                   | 271-281                            | -0.9286                          | 0.1193                           | 0.9260                    |
|      | 276-295                            | 0.9875                           | 0.4968                           | -0.9830                   | 273-281                            | -0.9021                          | 0.1474                           | 0.9164                    |
|      | 276-303                            | 0.9414                           | 0.4797                           | -0.9453                   | 276-250                            | -0.9197                          | -0.4196                          | 0.9359                    |
|      | 276-304                            | 0.9716                           | 0.4955                           | -0.9533                   | 276-283                            | -0.9108                          | -0.5905                          | 0.9717                    |
|      | 276-305                            | 0.9930                           | 0.6246                           | -0.9932                   | 276-317                            | -0.9699                          | -0.5462                          | 0.9295                    |
|      | 277-291                            | 0.9855                           | 0.0832                           | -0.9778                   | 276-318                            | -0.9883                          | -0.6824                          | 0.9568                    |
|      | 277-292                            | 0.9895                           | 0.1606                           | -0.9743                   | 276-319                            | -0.9836                          | -0.6589                          | 0.9610                    |
|      | 277-294                            | 0.9713                           | -0.0073                          | -0.9670                   | 276-320                            | -0.9594                          | -0.7712                          | 0.9155                    |
|      | 277-295                            | 0.9608                           | -0.0240                          | -0.9397                   | 276-340                            | -0.9659                          | -0.7587                          | 0.9277                    |
|      | 277-305                            | 0.9728                           | 0.0387                           | -0.9922                   | 276-341                            | -0.9876                          | -0.7496                          | 0.9153                    |
|      | 277-306                            | 0.9435                           | 0.0927                           | -0.9949                   | 277-250                            | -0.9055                          | 0.2900                           | 0.9885                    |
|      | 441-349                            | 0.9842                           | -0.0872                          | -0.9439                   | 277-317                            | -0.9045                          | 0.1631                           | 0.9857                    |
|      | 441-370                            | 0.9915                           | -0.0679                          | -0.9561                   | 277-318                            | -0.9646                          | -0.0457                          | 0.9763                    |
|      | 441-371                            | 0.9763                           | -0.2027                          | -0.9490                   | 277-319                            | -0.9512                          | -0.0195                          | 0.9762                    |

|         |        |         |         |         |         |         |        |
|---------|--------|---------|---------|---------|---------|---------|--------|
| 441-377 | 0.9627 | -0.2294 | -0.9050 | 277-340 | -0.9815 | -0.1516 | 0.9439 |
| 441-400 | 0.9481 | -0.2132 | -0.9323 | 277-341 | -0.9927 | -0.1038 | 0.9489 |
| 441-413 | 0.9664 | -0.1851 | -0.9375 | 277-342 | -0.9947 | -0.1262 | 0.9123 |
| 441-436 | 0.9069 | -0.2524 | -0.9089 | 277-343 | -0.9642 | 0.0220  | 0.9222 |
| 441-437 | 0.9197 | -0.2899 | -0.9143 | 277-344 | -0.9634 | 0.1086  | 0.9226 |
| 441-438 | 0.9629 | -0.2787 | -0.9128 | 442-267 | -0.9506 | -0.7068 | 0.9007 |
| 441-439 | 0.9614 | -0.2595 | -0.9212 | 442-268 | -0.9108 | -0.5609 | 0.9855 |
| 441-440 | 0.9367 | -0.3096 | -0.9332 | 442-269 | -0.9577 | -0.6101 | 0.9612 |
| 441-441 | 0.9143 | -0.3078 | -0.9347 | 442-270 | -0.9413 | -0.5739 | 0.9809 |
| 441-444 | 0.9407 | -0.1850 | -0.9316 | 442-271 | -0.9620 | -0.5903 | 0.9709 |
| 442-313 | 0.9184 | 0.4338  | -0.9822 | 442-272 | -0.9703 | -0.6009 | 0.9651 |
| 442-314 | 0.9459 | 0.5820  | -0.9054 | 442-273 | -0.9769 | -0.6092 | 0.9590 |
| 442-347 | 0.9856 | 0.7299  | -0.9180 | 442-274 | -0.9945 | -0.6559 | 0.9209 |
| 442-348 | 0.9154 | 0.6720  | -0.9326 | 442-275 | -0.9963 | -0.6771 | 0.9052 |
| 442-349 | 0.9017 | 0.7529  | -0.9660 | 442-276 | -0.9981 | -0.6528 | 0.9286 |
| 442-371 | 0.9932 | 0.6629  | -0.9655 | 442-277 | -0.9989 | -0.6427 | 0.9385 |
| 442-372 | 0.9270 | 0.6319  | -0.9012 | 442-278 | -0.9784 | -0.5733 | 0.9740 |
| 442-376 | 0.9983 | 0.6723  | -0.9109 | 442-279 | -0.9140 | -0.5883 | 0.9770 |
| 442-377 | 0.9950 | 0.6330  | -0.9344 | 442-301 | -0.9794 | -0.6412 | 0.9080 |
| 442-378 | 0.9186 | 0.4968  | -0.9652 | 442-327 | -0.9179 | -0.4911 | 0.9850 |
| 442-400 | 0.9957 | 0.6337  | -0.9584 | 442-328 | -0.9132 | -0.4801 | 0.9833 |
| 442-411 | 0.9781 | 0.6149  | -0.9058 | 443-266 | -0.9019 | 0.1972  | 0.9432 |
| 442-436 | 0.9199 | 0.5599  | -0.9604 | 443-267 | -0.9731 | 0.3897  | 0.9663 |
| 442-437 | 0.9463 | 0.5601  | -0.9598 | 443-268 | -0.9271 | 0.2733  | 0.9194 |
| 442-438 | 0.9873 | 0.6185  | -0.9426 | 443-269 | -0.9046 | 0.3519  | 0.9507 |
| 442-439 | 0.9802 | 0.6331  | -0.9523 | 443-278 | -0.9353 | 0.2552  | 0.9079 |
| 442-440 | 0.9828 | 0.5889  | -0.9642 | 443-279 | -0.9950 | 0.2311  | 0.9089 |

|   |         |        |         |         |         |         |         |        |
|---|---------|--------|---------|---------|---------|---------|---------|--------|
|   | 442-441 | 0.9549 | 0.5792  | -0.9731 |         |         |         |        |
|   | 442-442 | 0.9200 | 0.5335  | -0.9769 |         |         |         |        |
|   | 442-444 | 0.9062 | 0.6388  | -0.9753 |         |         |         |        |
| 3 | 247-423 | 0.9076 | -0.8170 | -0.9439 | 424-285 | -0.9992 | 0.5930  | 0.9150 |
|   | 249-423 | 0.9193 | -0.6611 | -0.9800 | 424-286 | -0.9919 | 0.6250  | 0.9545 |
|   | 265-423 | 0.9109 | -0.8756 | -0.9286 |         |         |         |        |
|   | 423-254 | 0.9136 | -0.9299 | -0.9961 |         |         |         |        |
|   | 423-342 | 0.9031 | -0.9378 | -0.9888 |         |         |         |        |
|   | 423-344 | 0.9054 | -0.9258 | -0.9913 |         |         |         |        |
|   | 423-382 | 0.9098 | -0.8725 | -0.9887 |         |         |         |        |
|   | 423-383 | 0.9347 | -0.8795 | -0.9889 |         |         |         |        |
|   | 423-384 | 0.9635 | -0.8791 | -0.9769 |         |         |         |        |
|   | 423-385 | 0.9580 | -0.8869 | -0.9704 |         |         |         |        |
|   | 423-386 | 0.9772 | -0.8750 | -0.9163 |         |         |         |        |
|   | 423-387 | 0.9659 | -0.8961 | -0.9494 |         |         |         |        |
|   | 423-388 | 0.9608 | -0.8720 | -0.9798 |         |         |         |        |
|   | 423-389 | 0.9168 | -0.9006 | -0.9886 |         |         |         |        |
|   | 423-430 | 0.9595 | -0.8475 | -0.9136 |         |         |         |        |
|   | 423-431 | 0.9451 | -0.8485 | -0.9375 |         |         |         |        |
|   | 423-433 | 0.9315 | -0.8903 | -0.9853 |         |         |         |        |
|   | 423-434 | 0.9168 | -0.8906 | -0.9904 |         |         |         |        |
|   | 423-435 | 0.9112 | -0.9051 | -0.9937 |         |         |         |        |
|   | 423-436 | 0.9040 | -0.9024 | -0.9919 |         |         |         |        |
|   | 423-439 | 0.9019 | -0.9303 | -0.9980 |         |         |         |        |
|   | 423-441 | 0.9109 | -0.9139 | -0.9897 |         |         |         |        |
|   | 423-442 | 0.9070 | -0.9257 | -0.9956 |         |         |         |        |
|   | 423-443 | 0.9023 | -0.9044 | -0.9887 |         |         |         |        |
| 5 |         |        |         |         | 243-442 | -0.9390 | -0.5455 | 0.9620 |
|   |         |        |         |         | 244-442 | -0.9017 | -0.2047 | 0.9481 |
|   |         |        |         |         | 270-442 | -0.9858 | -0.3553 | 0.9794 |

|  |         |         |         |        |
|--|---------|---------|---------|--------|
|  | 271-442 | -0.9285 | 0.3097  | 0.9606 |
|  | 272-442 | -0.9886 | 0.1247  | 0.9827 |
|  | 273-442 | -0.9324 | 0.6893  | 0.9765 |
|  | 391-442 | -0.9385 | -0.5798 | 0.9154 |
|  | 394-442 | -0.9636 | -0.6255 | 0.9018 |
|  | 395-442 | -0.9221 | -0.6679 | 0.9130 |
|  | 436-442 | -0.9019 | -0.9398 | 0.9615 |

## Supplementary Movies

Note: As a guide to the eye, supplementary movies illustrating PC modes of 1:1 and 2:1 Fc $\alpha$ RI-Fc $\alpha$  indicate the X-ray configuration of receptor molecules (yellow).

**Movie SM1. Unliganded Fc $\alpha$  mode motion in PC mode 1**

**Movie SM2. 1:1 Fc $\alpha$ RI-Fc $\alpha$  mode motion in PC mode 1**

**Movie SM3. 2:1 Fc $\alpha$ RI-Fc $\alpha$  mode motion in PC mode 1**

**Movie SM4. Unliganded Fc $\alpha$  mode motion in PC mode 2**

**Movie SM5. 1:1 Fc $\alpha$ RI-Fc $\alpha$  mode motion in PC mode 2**

**Movie SM6. 2:1 Fc $\alpha$ RI-Fc $\alpha$  mode motion in PC mode 2**

**Movie SM7. Unliganded Fc $\alpha$  mode motion in PC mode 3**

**Movie SM8. 1:1 Fc $\alpha$ RI-Fc $\alpha$  mode motion in PC mode 3**

**Movie SM9. 2:1 Fc $\alpha$ RI-Fc $\alpha$  mode motion in PC mode 3**

**Movie SM10. Unliganded Fc $\alpha$  mode motion in PC mode 4**

**Movie SM11. 1:1 Fc $\alpha$ RI-Fc $\alpha$  mode motion in PC mode 4**

**Movie SM12. 2:1 Fc $\alpha$ RI-Fc $\alpha$  mode motion in PC mode 4**

**Movie SM13. Unliganded Fc $\alpha$  mode motion in PC mode 5**

**Movie SM14. 1:1 Fc $\alpha$ RI-Fc $\alpha$  mode motion in PC mode 5**

**Movie SM15. 2:1 Fc $\alpha$ RI-Fc $\alpha$  mode motion in PC mode 5**

## Supplementary References

1. Whitmore L & Wallace BA (2004) DICHROWEB, an online server for protein secondary structure analyses from circular dichroism spectroscopic data. *Nucleic acids research* 32(Web Server issue):W668-673.
2. Sreerama N & Woody RW (2000) Estimation of protein secondary structure from circular dichroism spectra: comparison of CONTIN, SELCON, and CDSSTR methods with an expanded reference set. *Analytical biochemistry* 287(2):252-260.
3. Conrady DG, *et al.* (2008) A zinc-dependent adhesion module is responsible for intercellular adhesion in staphylococcal biofilms. *Proc Natl Acad Sci U S A* 105(49):19456-19461.
4. Day YS, Baird CL, Rich RL, & Myszka DG (2002) Direct comparison of binding equilibrium, thermodynamic, and rate constants determined by surface- and solution-based biophysical methods. *Protein Sci* 11(5):1017-1025.
5. Herr AB, White CL, Milburn C, Wu C, & Bjorkman PJ (2003) Bivalent binding of IgA1 to Fc $\alpha$ RI suggests a mechanism for cytokine activation of IgA phagocytosis. *J Mol Biol* 327(3):645-657.
6. Herr AB, Ballister ER, & Bjorkman PJ (2003) Insights into IgA-mediated immune responses from the crystal structures of human Fc $\alpha$ RI and its complex with IgA1-Fc. *Nature* 423(6940):614-620.
7. Ramsland PA, *et al.* (2007) Structural basis for evasion of IgA immunity by *Staphylococcus aureus* revealed in the complex of SSL7 with Fc of human IgA1. *Proc Natl Acad Sci U S A* 104(38):15051-15056.
8. Taylor AI, Fabiane SM, Sutton BJ, & Calvert RA (2009) The crystal structure of an avian IgY-Fc fragment reveals conservation with both mammalian IgG and IgE. *Biochemistry* 48(3):558-562.
9. Brunger AT, *et al.* (1998) Crystallography & NMR system: A new software suite for macromolecular structure determination. *Acta Crystallogr D Biol Crystallogr* 54(Pt 5):905-921.
10. Krissinel E & Henrick K (2007) Inference of macromolecular assemblies from crystalline state. *J Mol Biol* 372(3):774-797.
